# Supplementary material for: The vacuolar fusion regulated by HOPS complex promotes hyphal initiation and penetration in Candida albicans
Source: PubMed Central journal article supplement (PMC11099166; doi:10.1038/s41467-024-48525-5), 2024-05-16
Supplement: 41467_2024_48525_MOESM3_ESM.pdf [file 41467_2024_48525_MOESM3_ESM.pdf]

**Supplementary Video 1.** The fusion process of vacuoles during hyphal growth in GFP-tagged Yvc1 strains with VacuRed. The Yvc1-GFP strains were cultured in RPMI 1640 + 10% FBS medium at 37 °C for 90 min, and stained with 500 nM VacuRed at 37 °C for 10 min. The vacuoles were observed every 30 s. A 10 min time period is shown. The fluorescence of GFP was excited by a 488 nm laser and collected at 507 nm. Videos were exported using LAS AF Lite (2.6.1\_7314). Scale bar = 2.5  $\mu$ m.

**Supplementary Video 2.** The fusion process of vacuoles during hyphal growth in GFP-tagged Yvc1 strains with VacuRed. The Yvc1-GFP strains were cultured in RPMI 1640 + 10% FBS medium at 37 °C for 90 min, and stained with 500 nM VacuRed at 37 °C for 10 min. The vacuoles were observed every 30 s. A 10 min time period is shown. Fluorescence of VacuRed was excited by a 545 nm laser and collected between 590 nm and 670 nm. The fluorescence of GFP was excited by a 488 nm laser and collected at 507 nm. Videos were exported using LAS AF Lite (2.6.1\_7314). Scale bar = 2.5  $\mu$ m.

**Supplementary Video 3.** No obvious fusion process of vacuoles during hyphal growth in GFP-tagged Yvc1 *vam6* $\Delta/\Delta$  strains with VacuRed. The Yvc1-GFP *vam6* $\Delta/\Delta$  strains were cultured in RPMI 1640 + 10% FBS medium at 37 °C for 90 min, and stained with 500 nM VacuRed at 37 °C for 10 min. The vacuoles were observed every 30 s. A 10 min time period is shown. The fluorescence of GFP was excited by a 488 nm laser and collected at 507 nm. Videos were exported using LAS AF Lite (2.6.1\_7314). Scale bar = 2.5  $\mu$ m.

**Supplementary Video 4.** No obvious fusion process of vacuoles during hyphal growth in GFP-tagged Yvc1 *vam6* $\Delta/\Delta$  strains with VacuRed. The Yvc1-GFP *vam6* $\Delta/\Delta$  strains were cultured in RPMI 1640 + 10% FBS medium at 37 °C for 90 min, and stained with 500 nM VacuRed at 37 °C for 10 min. The vacuoles were observed every 30 s. A 10 min time period is shown. Fluorescence of VacuRed was excited by a 545 nm laser and collected between 590 nm and 670 nm. The fluorescence of GFP was excited by a 488 nm laser and collected at 507 nm. Videos were exported using LAS AF Lite (2.6.1\_7314). Scale bar = 2.5  $\mu$ m.

**Supplementary Video 5.** No obvious fusion process of vacuoles during hyphal growth in *vam6* $\Delta/\Delta$  strains. The *C. albicans* strains were cultured in RPMI 1640 + 10% FBS medium at 37 °C for 90 min, and stained with 500 nM VacuRed at 37 °C for 10 min. The vacuoles were observed every 30 s. A 10 min time period is shown. Fluorescence of VacuRed was excited by a 545 nm laser and collected between 590 nm and 670 nm. Videos were exported using LAS AF Lite (2.6.1\_7314). Scale bar = 7.5  $\mu$ m.

**Supplementary Video 6.** No obvious fusion process of vacuoles during hyphal growth in *vps41* $\Delta/\Delta$  strains. The *C. albicans* strains were cultured in RPMI 1640 + 10% FBS medium at 37 °C for 90 min, and stained with 500 nM VacuRed at 37 °C for 10 min. The vacuoles were observed every 30 s. A 10 min time period is shown. Fluorescence of VacuRed was excited by a 545 nm laser and collected between 590 nm and 670 nm. Videos were exported using LAS AF Lite (2.6.1\_7314). Scale bar = 7.5  $\mu$ m.

**Supplementary Video 7.** No obvious fusion process of vacuoles during hyphal growth in *ypt72* $\Delta/\Delta$  strains. The *C. albicans* strains were cultured in RPMI 1640 + 10% FBS medium at 37 °C for 90 min, and stained with 500 nM VacuRed at 37 °C for 10 min. The vacuoles were observed every 30 s. A 10 min time period is shown. Fluorescence of VacuRed was excited by a 545 nm laser and collected between 590 nm and 670 nm. Videos were exported using LAS AF Lite (2.6.1\_7314). Scale bar = 7.5  $\mu$ m.
